# Supplementary material for: Novel covalent adaptable networks (CANs) of ethylene/1-octene copolymers (EOCs) made by free-radical processing: comparison of structure–property relationships of EOC CANs with EOC thermosets
Source: Royal Society of Chemistry journal article supplement (doi:10.1039/d3py00444a), 2023-01-01
Supplement: d3py00444a1.pdf [file d3py00444a1.pdf]

**Novel Covalent Adaptable Networks (CANs) of Ethylene/1-Octene Copolymers (EOCs)**

**Made by Free-Radical Processing:**

**Comparison of Structure-Property Relationships of EOC CANs with EOC Thermosets**

**Supporting Information**

**Boran Chen,<sup>a,#</sup> Logan M. Fenimore,<sup>a,#</sup> Yixuan Chen,<sup>a</sup> Stephanie Barbon,<sup>b</sup> Hayley Brown,<sup>c</sup>**

**Evelyn Auyeung,<sup>c</sup> Colin Li Pi Shan,<sup>c</sup> John M. Torkelson<sup>a,d,\*</sup>**

<sup>a</sup>Department of Chemical and Biological Engineering, Northwestern University,

Evanston, IL 60208 USA

<sup>b</sup>The Dow Chemical Company, Midland, MI 48674 USA

<sup>c</sup>The Dow Chemical Company, Lake Jackson, TX 77566 USA

<sup>d</sup>Department of Materials Science and Engineering, Northwestern University,

Evanston, IL 60208 USA

<sup>#</sup>co-first authors

\*corresponding author: j-torkelson@northwestern.edu

### **Synthesis of BiTEMPS Methacrylate (BTMA) Cross-Linker for Reprocessing Studies Via Extrusion.**

For reprocessing studies via extrusion, BTMA was synthesized using a modified method. In a nitrogen-filled glove box, TMPM (80.0 g, 355 mmol) was dissolved in 440 mL of pre-dried, degassed tetrahydrofuran (THF). Triethylamine (247.4 mL, 1775 mmol) was added, and the stirring solution was cooled to -35 °C in an acetone/dry ice bath. S<sub>2</sub>Cl<sub>2</sub> (14.2 mL, 178 mmol) was dissolved in 40 mL of THF and added dropwise to the cooled solution via syringe pump over 15 min. A yellow suspension formed; this suspension was warmed to room temperature and left to stir for 30 min. After, the suspension was poured into 3 L of DI water and stirred overnight. The resulting precipitate was dissolved in diethyl ether, and two liquid-liquid extractions were performed with brine. The organic layers were combined, dried over MgSO<sub>4</sub>, and filtered. Solvent was removed under vacuum to give an oil which was mixed with 500 mL of methanol and cooled at -20 °C overnight. After, the recrystallized white solid was dried under vacuum overnight to give BTMA (52.9 g, 55%).

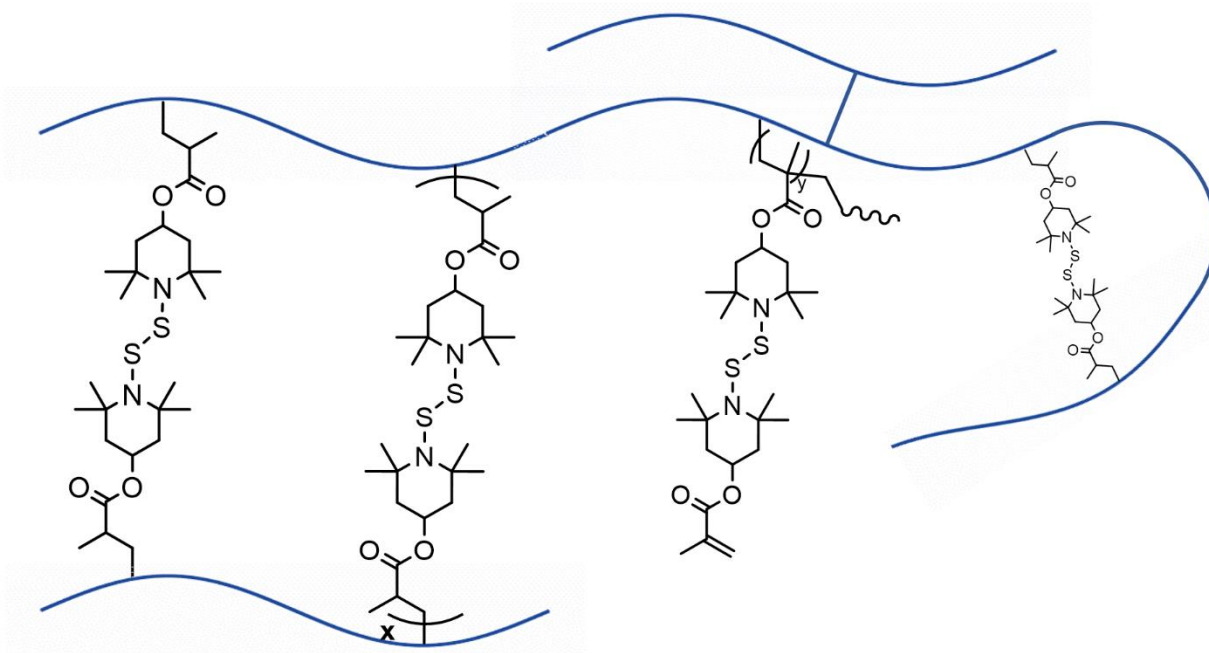

**Figure S1.** Possible chemistries during the preparation of EOC CANs, including single cross-links, cross-links of a run of multiple BTMA units, dangling BTMA units or runs, intra-chain loops, and permanent crosslinks.

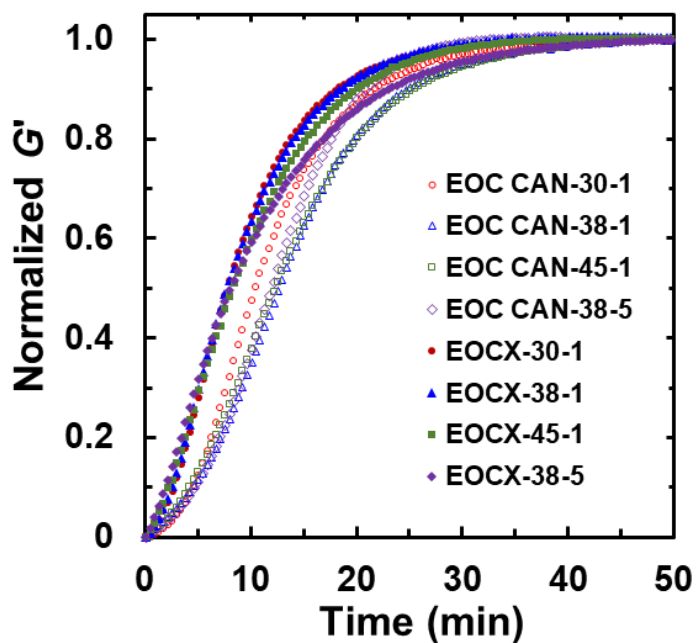

**Figure S2.** Normalized shear storage modulus ( $G'$ ) as a function of curing time at 180 °C obtained by small-amplitude oscillatory shear experiment with 1.0 Hz frequency and 0.1% strain (normalization is done relative to final  $G'$  value during curing).

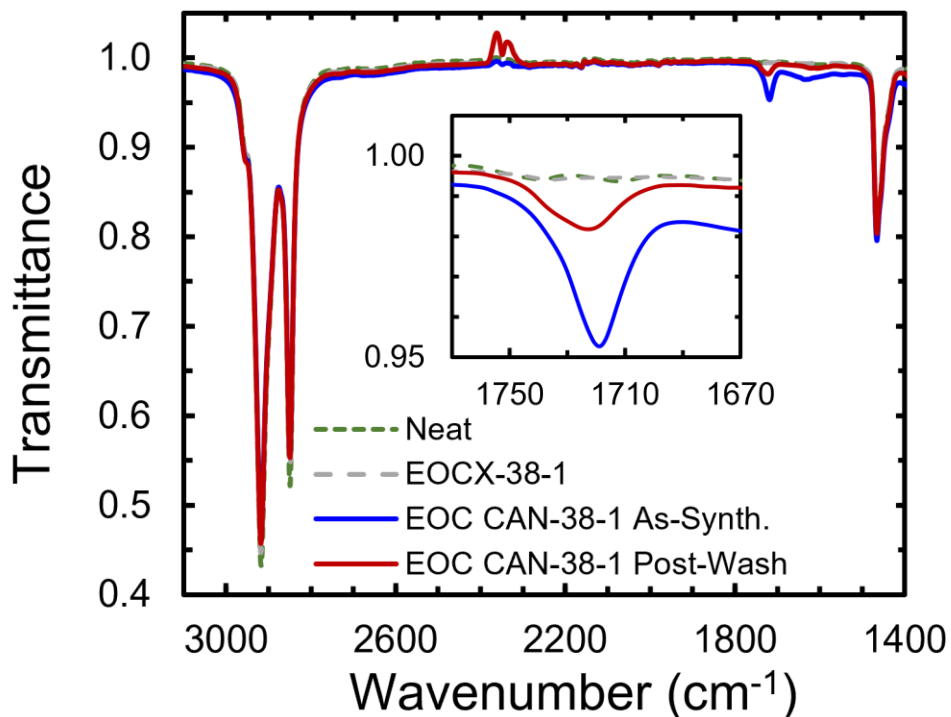

**Figure S3.** FTIR spectra of neat EOC-38-1, 1<sup>st</sup>-molded EOCX-38-1, and 1<sup>st</sup>-molded EOC CAN-38-1 before and after washing in boiling xylene via Soxhlet extraction. The carbonyl stretch at  $\sim 1720\text{ cm}^{-1}$  indicates that BTMA was grafted to EOC backbones during reactive processing.

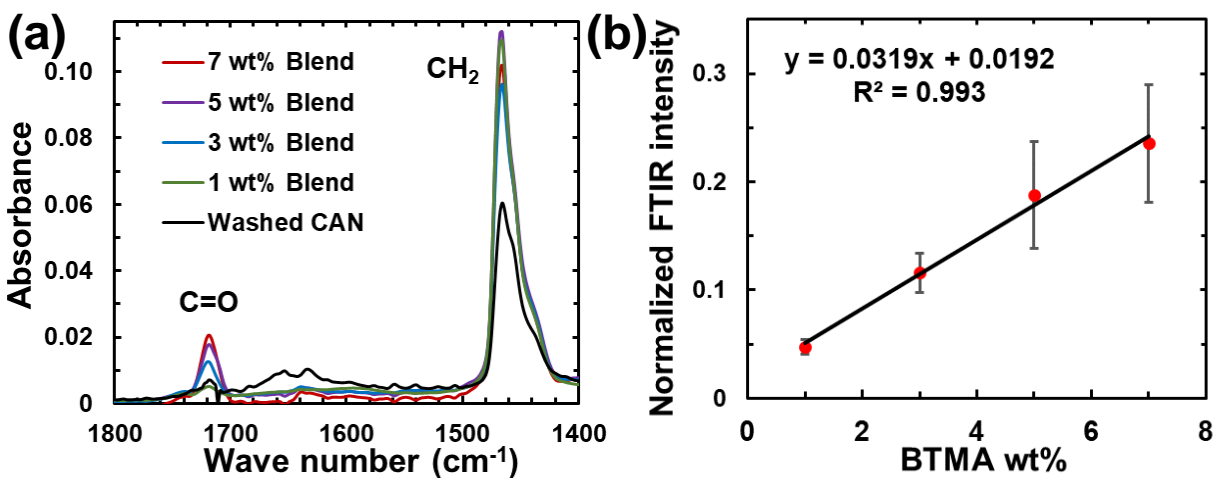

**Figure S4.** (a) FTIR spectra of blends of EOC-30-1 with varying amounts of BTMA and washed EOC CAN-30-1. (b) FTIR calibration curve: intensity of BTMA C=O ( $1720\text{ cm}^{-1}$ ) normalized by C-H ( $1470\text{ cm}^{-1}$ ) as a function of BTMA wt% in blends of EOC-30-1 with varying amounts of BTMA.

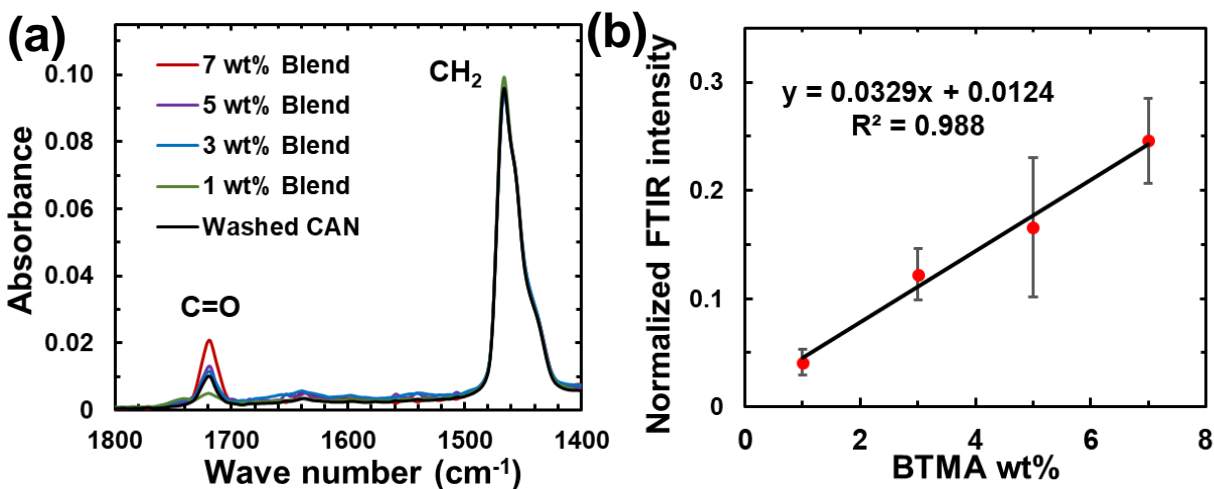

**Figure S5.** (a) FTIR spectra of blends of EOC-38-1 with varying amounts of BTMA and washed EOC CAN-38-1. (b) FTIR calibration curve: intensity of BTMA C=O ( $1720\text{ cm}^{-1}$ ) normalized by C-H ( $1470\text{ cm}^{-1}$ ) as a function of BTMA wt% in blends of EOC-38-1 with varying amounts of BTMA.

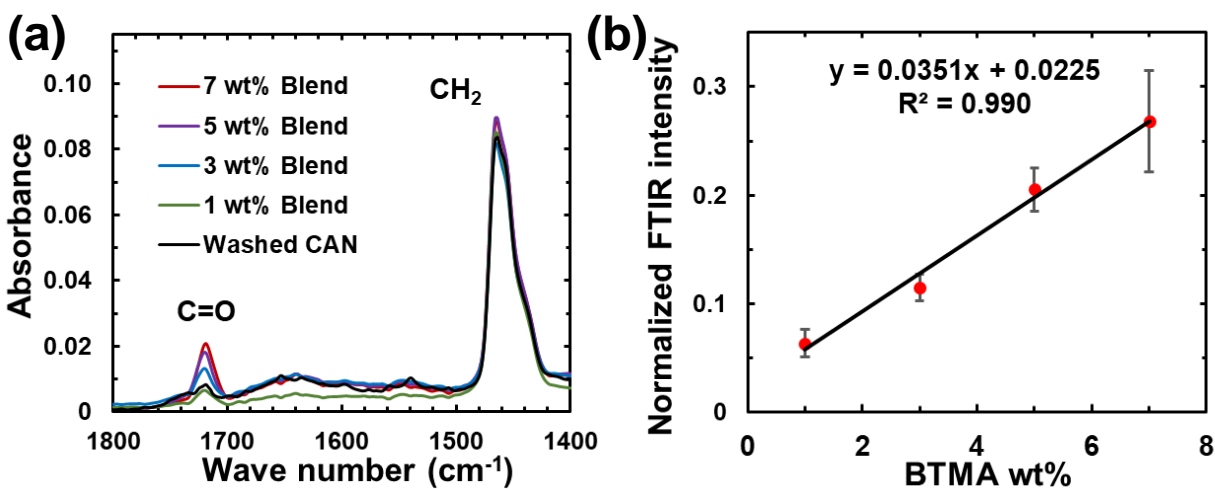

**Figure S6.** (a) FTIR spectra of blends of EOC-45-1 with varying amounts of BTMA and washed EOC CAN-45-1. (b) FTIR calibration curve: intensity of BTMA C=O ( $1720\text{ cm}^{-1}$ ) normalized by C-H ( $1470\text{ cm}^{-1}$ ) as a function of BTMA wt% in blends of EOC-45-1 with varying amounts of BTMA.

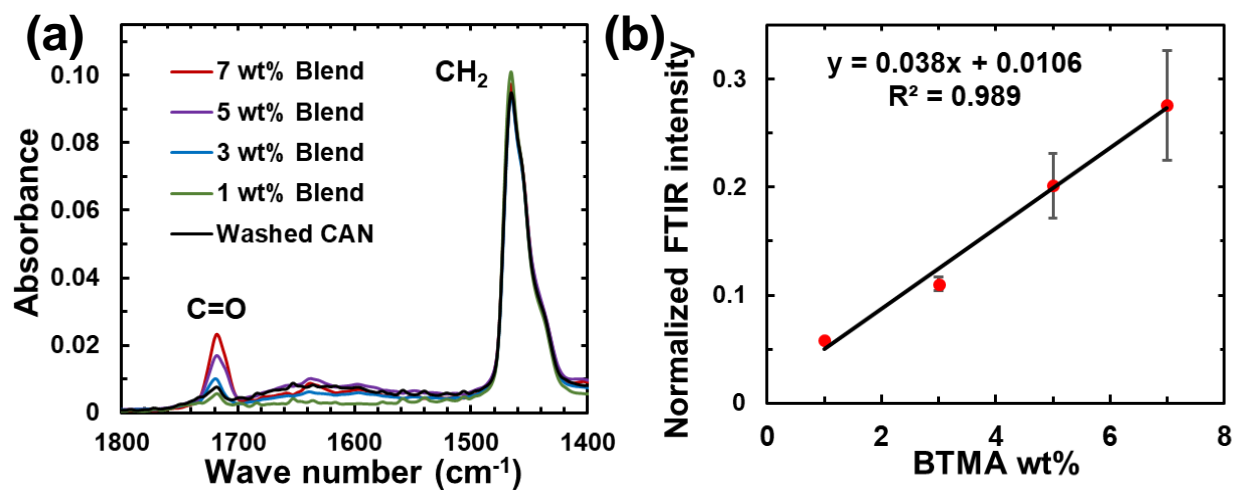

**Figure S7.** (a) FTIR spectra of blends of EOC-38-5 with varying amounts of BTMA and washed EOC CAN-38-5. (b) FTIR calibration curve: intensity of BTMA C=O (1720 cm<sup>-1</sup>) normalized by C-H (1470 cm<sup>-1</sup>) as a function of BTMA wt% in blends of EOC-38-5 with varying amounts of BTMA.

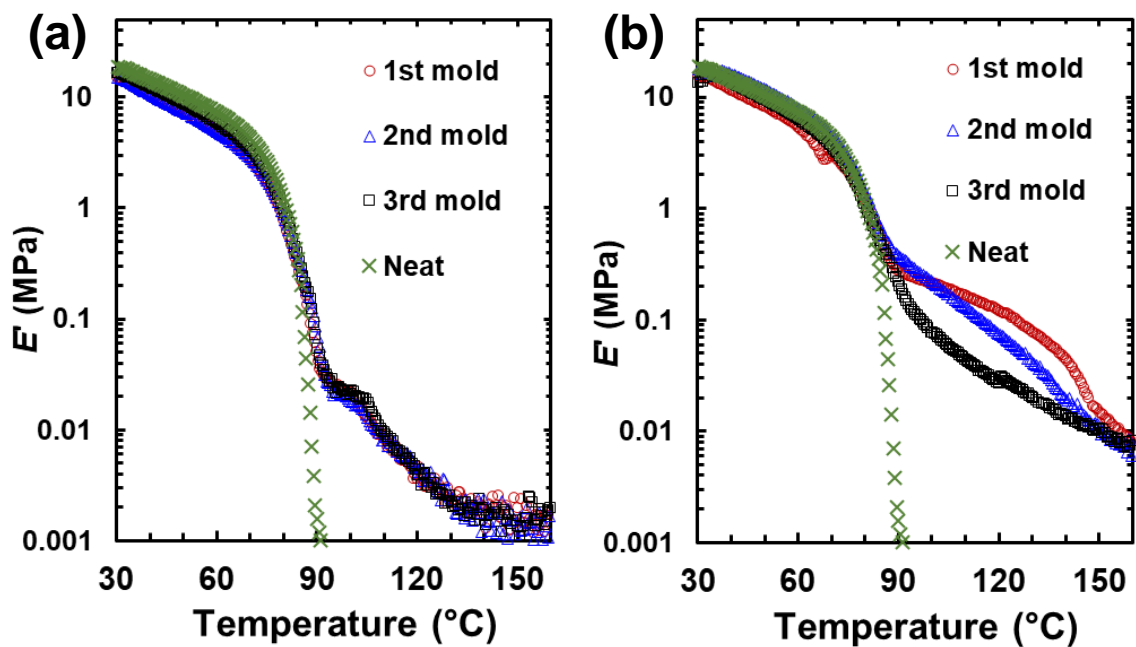

**Figure S8.** Tensile storage modulus ( $E'$ ) as a function of temperature and molding of (a) EOC CAN-31-30 with 5 wt% BTMA and 1 wt% DCP and (b) EOC CAN-31-30 with 10 wt% BTMA and 2 wt% DCP alongside neat EOC-31-30.

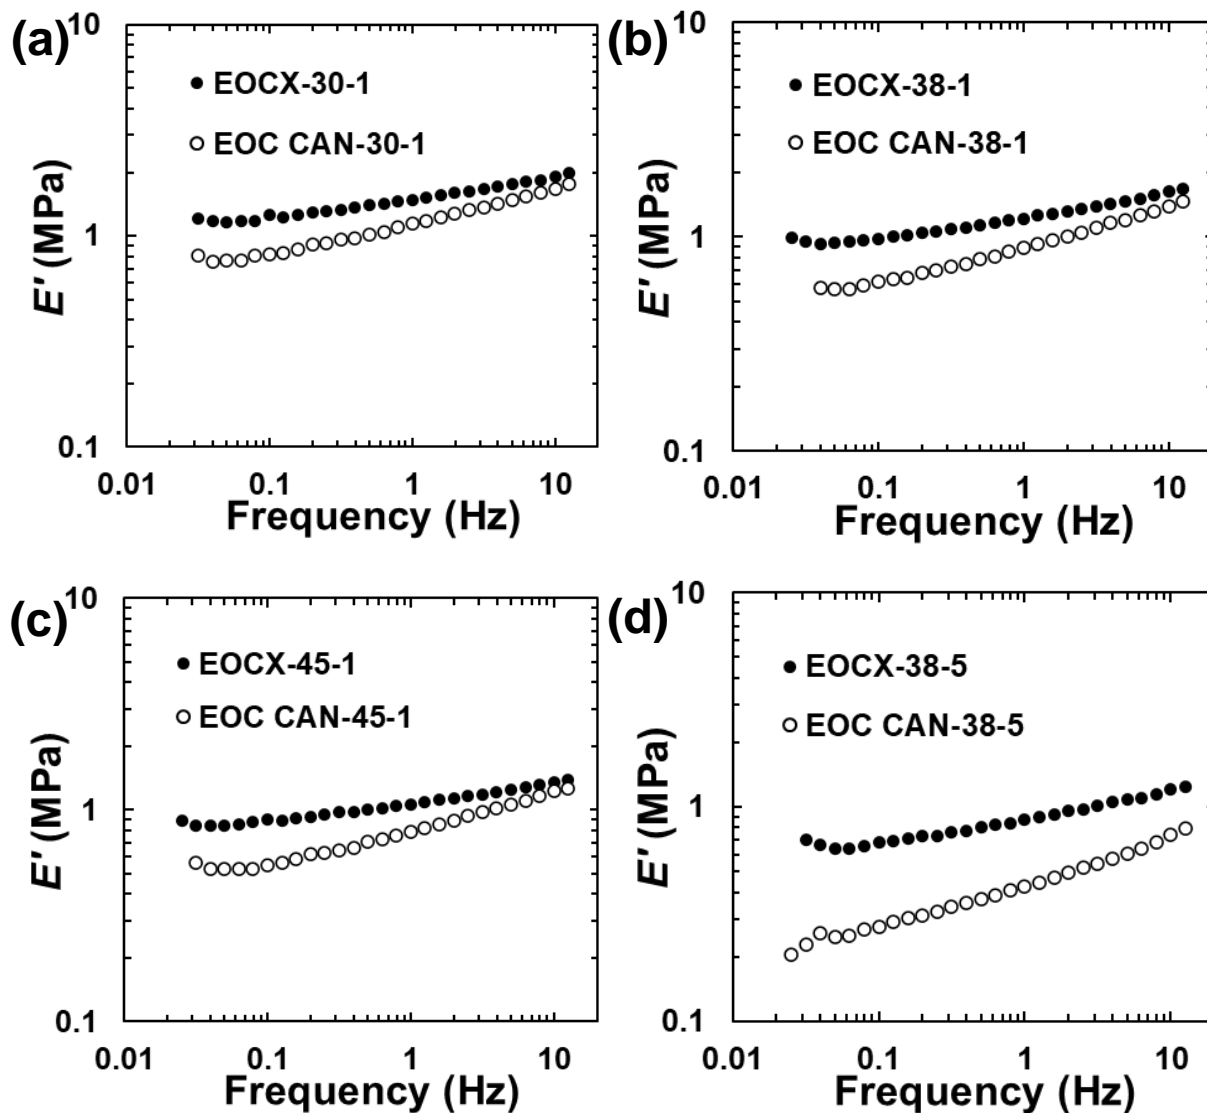

**Figure S9.** Storage modulus ( $E'$ ) at 100 °C as a function of frequency for EOCXs (filled symbols) and EOC CANs (open symbols) made from (a) EOC-30-1, (b) EOC-38-1, (c) EOC-45-1, and (d) EOC-38-5.



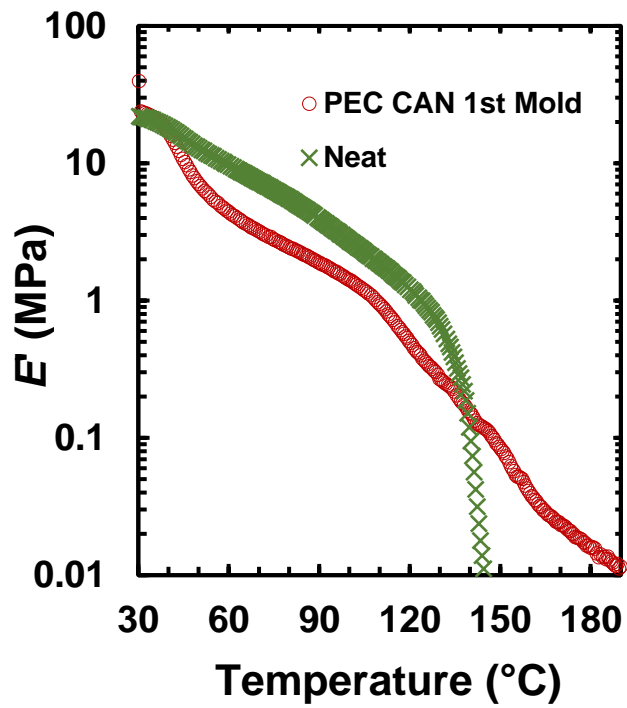

**Figure S10.** Tensile storage modulus ( $E'$ ) as a function of temperature for neat PEC as well as its failed cross-linking attempt (PEC CAN 1<sup>st</sup> Mold).

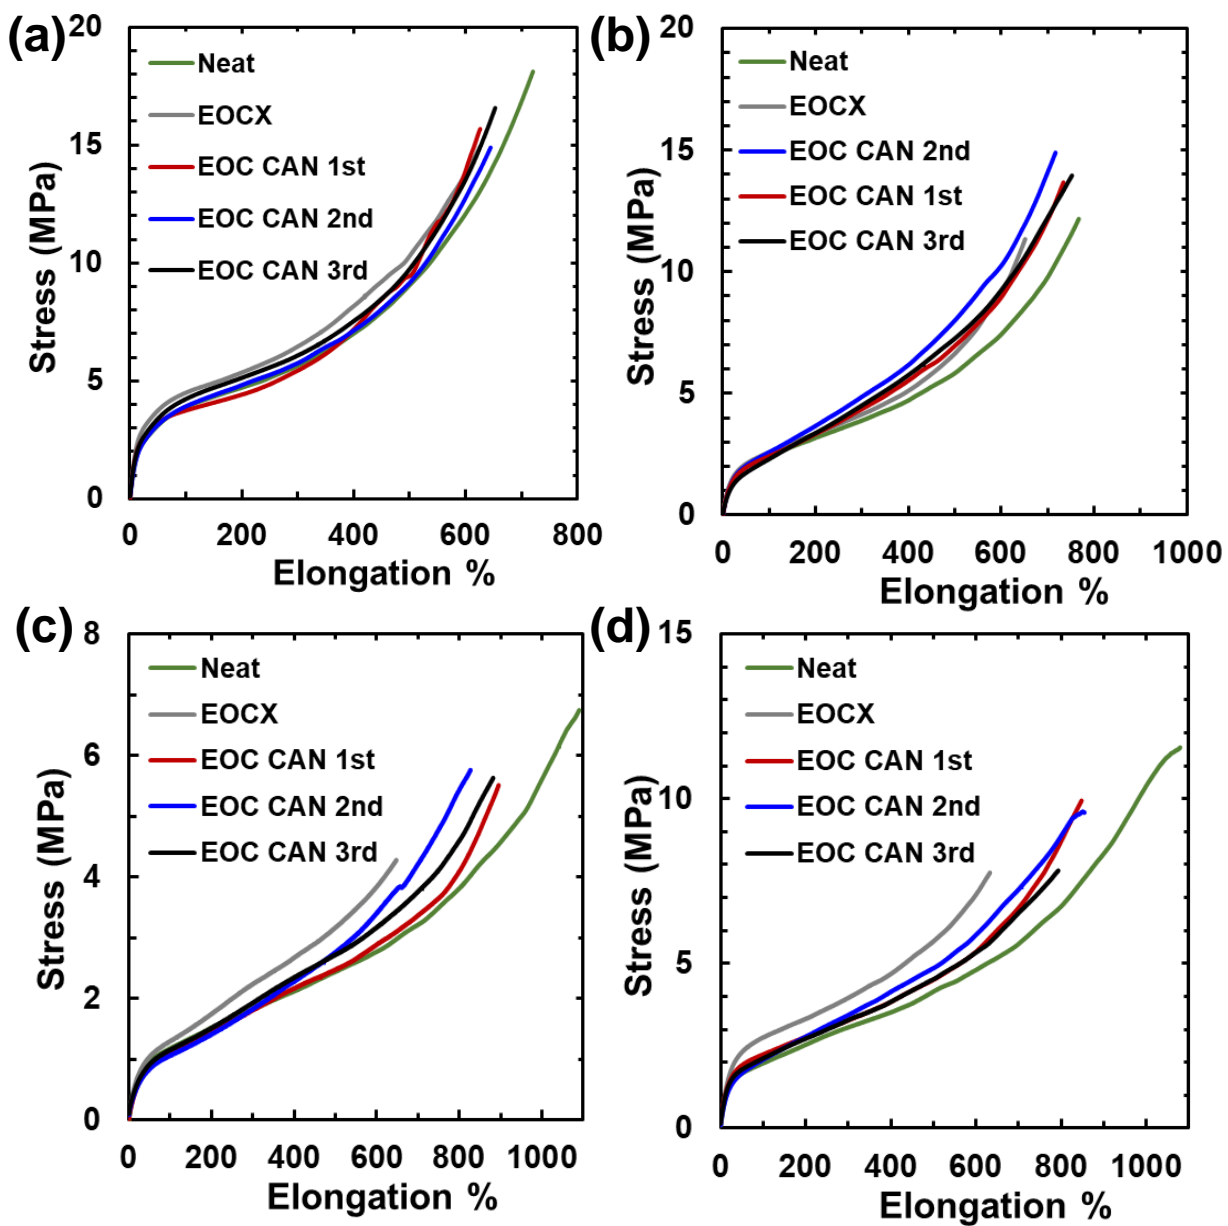

**Figure S11.** Room-temperature stress-elongation curves of EOCXs and EOC CANs made from (a) EOC-30-1, (b) EOC-38-1, (c) EOC-45-1, and (d) EOC-38-5 with their corresponding neat counterparts.

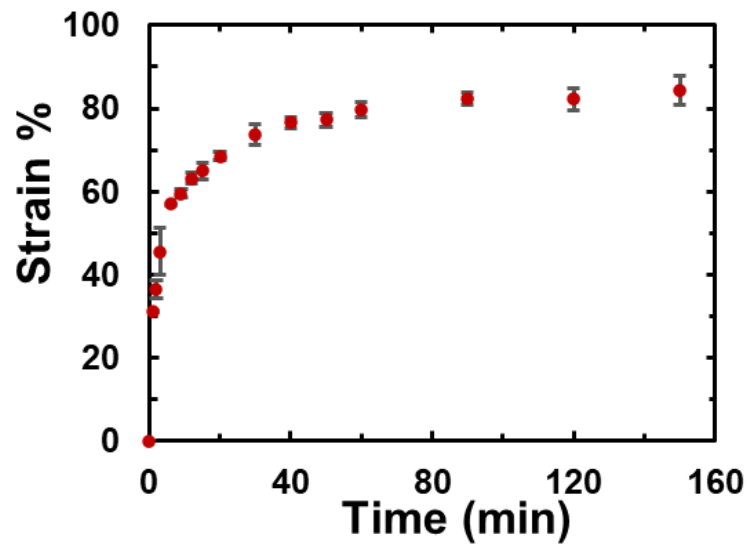

**Figure S12.** Strain as a function of time for EOC CAN-45-1 at 50 °C under a tensile load of 0.33 MPa.

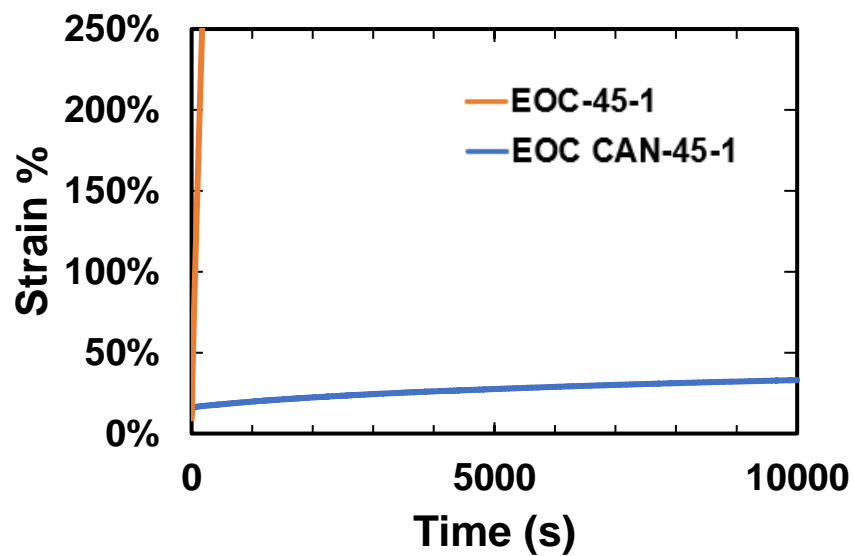

**Figure S13.** Strain as a function of time for EOC-45-1 and EOC CAN-45-1 at 90 °C under a shear load of 3.0 kPa.

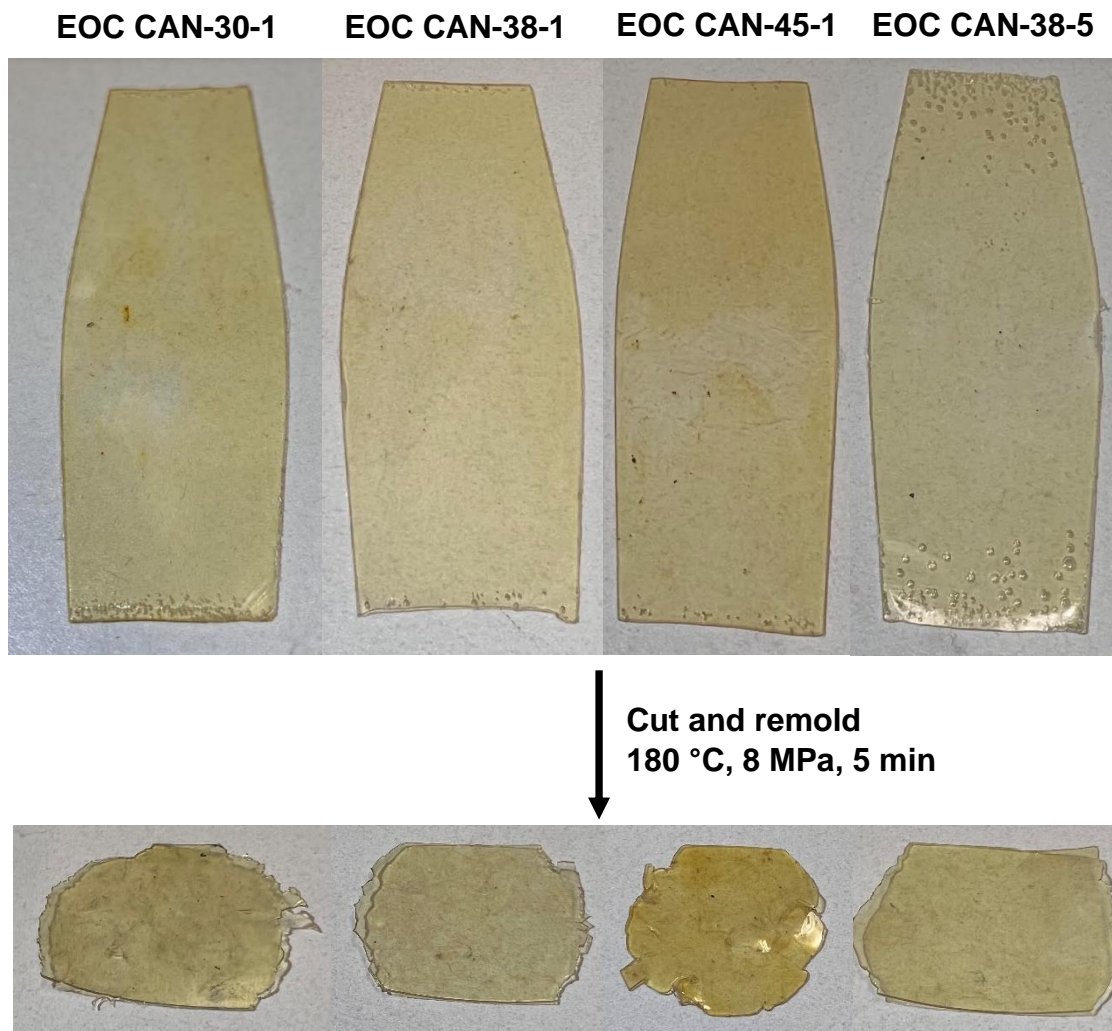

**Figure S14.** Reprocessing of 1<sup>st</sup>-molded EOC CANs (top) by cutting and compression-molding (180 °C, 8 MPa, 5 min) pieces into healed films as the 2<sup>nd</sup>-mold samples (bottom). Another reprocessing step to prepare the 3<sup>rd</sup>-molded samples was performed in a similar manner.

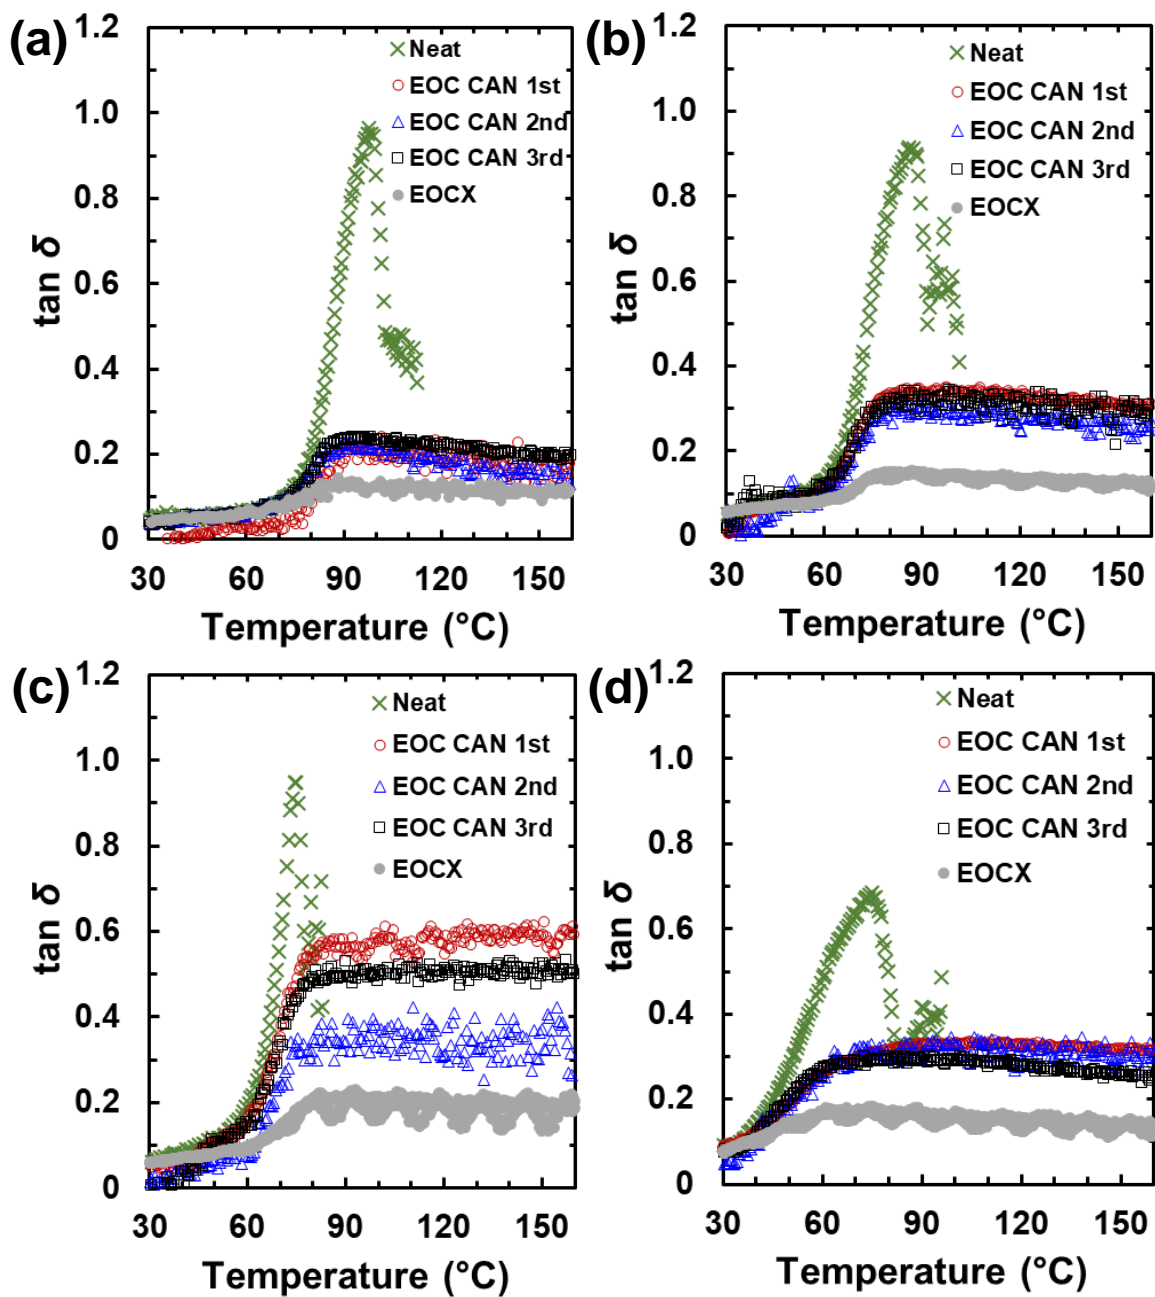

**Figure S15.**  $\tan \delta$  as a function of temperature and molding of EOC CANs made from (a) EOC-30-1, (b) EOC-38-1, (c) EOC-45-1, and (d) EOC-38-5 with their corresponding EOCXs and neat counterparts.

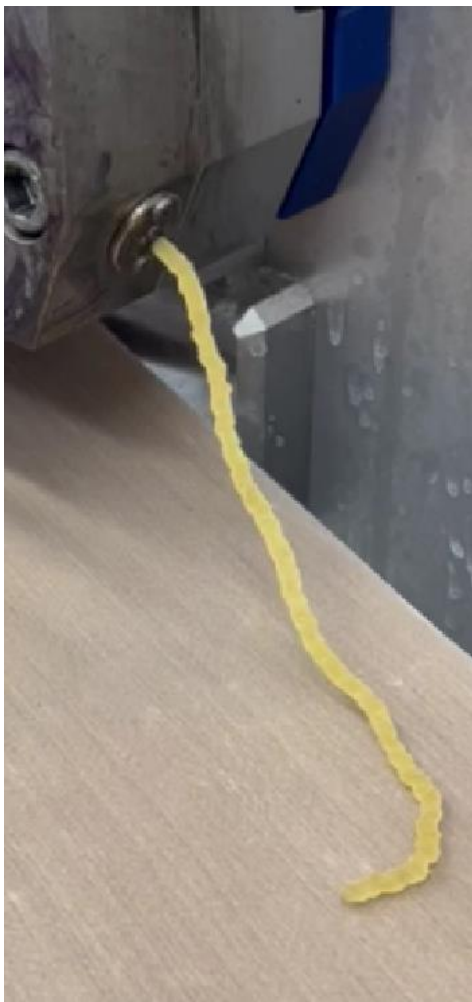

**Figure S16.** Extrusion of EOC CAN-38-1 at 200 °C. Note the surface defects from melt fracture.

**Table S1.** Thermal properties by DSC of neat EOCs, EOCXs, EOC CANs, and PEC as a function of molding step.

| Material         | Sample       | Mold            | $T_{m,peak}$ (°C) | $T_{m,endpoint}$ (°C) | Crystallinity (%) |
|------------------|--------------|-----------------|-------------------|-----------------------|-------------------|
| <b>EOC-30-1</b>  | Neat         | --              | 81                | 98                    | 23                |
|                  | EOCX-30-1    | --              | 78                | 95                    | 20                |
|                  | EOC CAN-30-1 | 1 <sup>st</sup> | 78                | 95                    | 21                |
|                  |              | 2 <sup>nd</sup> | 78                | 94                    | 21                |
|                  |              | 3 <sup>rd</sup> | 78                | 94                    | 20                |
| <b>EOC-38-1</b>  | Neat         | --              | 63                | 85                    | 18                |
|                  | EOCX-38-1    | --              | 64                | 80                    | 14                |
|                  | EOC CAN-38-1 | 1 <sup>st</sup> | 63                | 83                    | 17                |
|                  |              | 2 <sup>nd</sup> | 62                | 82                    | 16                |
|                  |              | 3 <sup>rd</sup> | 64                | 82                    | 17                |
| <b>EOC-45-1</b>  | Neat         | --              | 50                | 67                    | 11                |
|                  | EOCX-45-1    | --              | 41                | 64                    | 7                 |
|                  | EOC CAN-45-1 | 1 <sup>st</sup> | 39                | 62                    | 7                 |
|                  |              | 2 <sup>nd</sup> | 40                | 63                    | 8                 |
|                  |              | 3 <sup>rd</sup> | 40                | 62                    | 8                 |
| <b>EOC-38-5</b>  | Neat         | --              | 63                | 85                    | 19                |
|                  | EOCX-38-5    | --              | 60                | 81                    | 17                |
|                  | EOC CAN-38-5 | 1 <sup>st</sup> | 60                | 85                    | 17                |
|                  |              | 2 <sup>nd</sup> | 61                | 82                    | 18                |
|                  |              | 3 <sup>rd</sup> | 61                | 81                    | 17                |
| <b>EOC-31-30</b> | Neat         | --              | 84                | 96                    | 15                |
| <b>PEC</b>       | Neat         | --              | 142               | 154                   | 14                |

**Table S2.** Times in which  $G'(t)/G'_0 = 0.95$  ( $t_{95}$ ) during SAOS curing tests for EOC CANs and EOCXs.

| Sample       | $t_{95}$ (min) |
|--------------|----------------|
| EOCX-30-1    | 23             |
| EOCX-38-1    | 23             |
| EOCX-45-1    | 27             |
| EOCX-38-5    | 24             |
| EOC CAN-30-1 | 27             |
| EOC CAN-38-1 | 29             |
| EOC CAN-45-1 | 30             |
| EOC CAN-38-5 | 24             |

**Table S3.**  $E'$  as a function of temperature and molding step for neat EOCs, EOCXs, and EOC CANs.

| Material        | Sample       | Mold            | $E'$ (MPa) <sup>a</sup> |             |             |             |
|-----------------|--------------|-----------------|-------------------------|-------------|-------------|-------------|
|                 |              |                 | 100 °C                  | 120 °C      | 140 °C      | 160 °C      |
| EOC-30-1        | Neat         | --              | 0.13                    | 0.0033      | 0.0011      | 0.0009      |
|                 | EOCX-30-1    | --              | 1.4 ± 0.3               | 1.4 ± 0.2   | 1.3 ± 0.2   | 1.54 ± 0.01 |
|                 | EOC CAN-30-1 | 1 <sup>st</sup> | 1.10 ± 0.09             | 0.99 ± 0.07 | 0.90 ± 0.04 | 0.79 ± 0.04 |
|                 |              | 2 <sup>nd</sup> | 1.14 ± 0.06             | 1.05 ± 0.03 | 1.01 ± 0.02 | 0.95 ± 0.01 |
| 3 <sup>rd</sup> |              | 1.14 ± 0.04     | 1.03 ± 0.03             | 0.96 ± 0.05 | 0.86 ± 0.09 |             |
| EOC-38-1        | Neat         | --              | 0.0092                  | 0.0015      | 0.0016      | 0.0014      |
|                 | EOCX-38-1    | --              | 1.3 ± 0.2               | 1.3 ± 0.2   | 1.2 ± 0.1   | 1.2 ± 0.1   |
|                 | EOC CAN-38-1 | 1 <sup>st</sup> | 0.76 ± 0.08             | 0.65 ± 0.04 | 0.56 ± 0.02 | 0.48 ± 0.03 |
|                 |              | 2 <sup>nd</sup> | 0.91 ± 0.04             | 0.76 ± 0.01 | 0.66 ± 0.02 | 0.58 ± 0.06 |
| 3 <sup>rd</sup> |              | 0.84 ± 0.04     | 0.74 ± 0.02             | 0.65 ± 0.05 | 0.59 ± 0.05 |             |
| EOC-45-1        | Neat         | --              | 0.0013                  | 0.0013      | 0.0010      | 0.0010      |
|                 | EOCX-45-1    | --              | 0.90                    | 0.81        | 0.80        | 0.80        |
|                 | EOC CAN-45-1 | 1 <sup>st</sup> | 0.69 ± 0.03             | 0.58 ± 0.03 | 0.52 ± 0.04 | 0.44 ± 0.05 |
|                 |              | 2 <sup>nd</sup> | 0.75 ± 0.01             | 0.63 ± 0.02 | 0.56 ± 0.02 | 0.52 ± 0.01 |
| 3 <sup>rd</sup> |              | 0.72 ± 0.07     | 0.62 ± 0.09             | 0.57 ± 0.05 | 0.56 ± 0.01 |             |
| EOC-38-5        | Neat         | --              | 0.0011                  | 0.0011      | 0.0010      | 0.0007      |
|                 | EOCX-38-5    | --              | 0.42 ± 0.03             | 0.39 ± 0.01 | 0.37 ± 0.02 | 0.36 ± 0.04 |
|                 | EOC CAN-38-5 | 1 <sup>st</sup> | 0.37 ± 0.04             | 0.29 ± 0.03 | 0.23 ± 0.03 | 0.15 ± 0.04 |
|                 |              | 2 <sup>nd</sup> | 0.42 ± 0.04             | 0.32 ± 0.02 | 0.23 ± 0.02 | 0.17 ± 0.03 |
| 3 <sup>rd</sup> |              | 0.45 ± 0.03     | 0.34 ± 0.03             | 0.25 ± 0.03 | 0.18 ± 0.05 |             |

<sup>a</sup>Determined by DMA. Error bars represent ± one standard deviation of three or four measurements.



**Table S4.** Characteristic relaxation times, stretching exponents, average relaxation times, and KWW decay function fits as a function of temperature for EOC CANs.

| EOC CAN      | T (°C) | $\tau^*$ (s) | $\beta$ | $\langle\tau\rangle$ (s) | R <sup>2</sup> |
|--------------|--------|--------------|---------|--------------------------|----------------|
| EOC CAN-30-1 | 100    | 208          | 0.26    | 3820                     | 0.98           |
|              | 120    | 123          | 0.32    | 869                      | 0.98           |
|              | 140    | 59           | 0.42    | 170                      | 0.98           |
|              | 160    | 26           | 0.49    | 55                       | 0.99           |
| EOC CAN-38-1 | 100    | 234          | 0.28    | 2960                     | 0.97           |
|              | 120    | 132          | 0.34    | 716                      | 0.98           |
|              | 140    | 63           | 0.45    | 160                      | 0.98           |
|              | 160    | 27           | 0.52    | 49                       | 0.99           |
| EOC CAN-45-1 | 100    | 33           | 0.23    | 1330                     | 0.98           |
|              | 120    | 29           | 0.30    | 280                      | 0.98           |
|              | 140    | 17           | 0.39    | 61                       | 0.98           |
|              | 160    | 8            | 0.54    | 14                       | 0.99           |
| EOC CAN-38-5 | 80     | 34           | 0.25    | 730                      | 0.98           |
|              | 100    | 30           | 0.34    | 160                      | 0.97           |
|              | 120    | 14           | 0.40    | 48                       | 0.98           |
|              | 140    | 7.6          | 0.55    | 13                       | 0.98           |
|              | 160    | < 1          | --      | < 1                      | --             |

**Table S5.** Room-temperature tensile properties of 1<sup>st</sup>-, 2<sup>nd</sup>-, and 3<sup>rd</sup>-molded EOC CANs.

| Sample       | Mold            | Young's modulus (MPa) <sup>a</sup> | Tensile strength (MPa) <sup>a</sup> | Elongation at break (%) <sup>a</sup> |
|--------------|-----------------|------------------------------------|-------------------------------------|--------------------------------------|
| EOC CAN-30-1 | 1 <sup>st</sup> | 21.7 ± 1.1                         | 13.4 ± 2.1                          | 650 ± 70                             |
|              | 2 <sup>nd</sup> | 18.6 ± 3.5                         | 14.4 ± 0.7                          | 660 ± 30                             |
|              | 3 <sup>rd</sup> | 18.7 ± 3.3                         | 16.7 ± 3.1                          | 670 ± 30                             |
| EOC CAN-38-1 | 1 <sup>st</sup> | 7.6 ± 3.5                          | 14.9 ± 1.9                          | 700 ± 110                            |
|              | 2 <sup>nd</sup> | 8.5 ± 0.8                          | 12.1 ± 4.0                          | 670 ± 60                             |
|              | 3 <sup>rd</sup> | 8.3 ± 0.3                          | 13.0 ± 0.6                          | 710 ± 50                             |
| EOC CAN-45-1 | 1 <sup>st</sup> | 3.0 ± 0.1                          | 5.1 ± 1.2                           | 830 ± 120                            |
|              | 2 <sup>nd</sup> | 3.0 ± 0.6                          | 5.0 ± 1.3                           | 790 ± 80                             |
|              | 3 <sup>rd</sup> | 2.6 ± 0.3                          | 5.4 ± 1.2                           | 850 ± 130                            |
| EOC CAN-38-5 | 1 <sup>st</sup> | 7.8 ± 0.9                          | 8.7 ± 1.2                           | 760 ± 80                             |
|              | 2 <sup>nd</sup> | 8.4 ± 0.8                          | 7.9 ± 2.4                           | 800 ± 190                            |
|              | 3 <sup>rd</sup> | 8.2 ± 1.0                          | 10.8 ± 2.2                          | 910 ± 220                            |

<sup>a</sup>Determined by tensile testing. Error bars represent ± one standard deviation of three measurements.
